# Supplementary material for: Insight into the Mode of Action of 8-Hydroxyquinoline-Based Blockers on the Histamine Receptor 2
Source: MDPI journal article supplement (doi:10.3390/bios13060571), 2023-05-23
Supplement: s1 [file s1]

# **Insight into the mode of action of 8-hydroxyquinoline-based blockers on the histamine receptor 2**

Amisha Patel<sup>1,2</sup>, Paola L. Marquez-Gomez<sup>3</sup>, Lily Torp<sup>3</sup>, Lily Gao<sup>3</sup>, Pamela Peralta-Yahya<sup>1,2,3\*</sup>

## **Supplementary Information**

### **Table of Contents**

|                                                 | <b>Page</b> |
|-------------------------------------------------|-------------|
| <b>Supplementary Table 1:</b> Table of Plasmids | SI2         |
| <b>Supplementary Table 2:</b> Table of Strains  | SI2         |
| <b>Supplementary Table 3:</b> Table of Primers  | SI2         |
| <b>Sequences</b>                                | SI3         |
| <b>References</b>                               | SI5         |

**Supplementary Table S1:** Table of Plasmids

| Plasmid Number | Plasmid Name | Description                     | Citation  |
|----------------|--------------|---------------------------------|-----------|
| PPY111         | pKM111       | pESC-His3-pTEF1-tCYC1           | 1         |
| PPY1740        | pEY15        | pRS415-Leu2-pFIG1-NanoLuc       | 2         |
| PPY2103        | pRLH16       | pESC-HIS3-pTEF-HR <sub>H2</sub> | 3         |
| PPY2359        | pPM43        | pESC-His3-pADH-pTEF-HRH2_D98A   | This work |
| PPY2366        | pPM49        | pESC-His3-pADH-pTEF-HRH2_F254A  | This work |
| PPY2367        | pPM52        | pESC-His3-pADH-pTEF-HRH2_D186A  | This work |
| PPY2368        | pPM54        | pESC-His3-pADH-pTEF-HRH2_Y250A  | This work |
| PPY2371        | pPM50        | pESC-His3-pADH-pTEF-HRH2_Y182A  | This work |
| PPY2373        | pPM53        | pESC-His3-pADH-pTEF-HRH2_T190A  | This work |

**Supplementary Table S2:** Table of Strains

| Strain Number | Description                                                                                                                   | Citation  |
|---------------|-------------------------------------------------------------------------------------------------------------------------------|-----------|
| PPY140        | <i>S. cerevisiae</i> W303MATa ade2-1 ura3-1 his3-11 trp1-1 leu2-3 leu2-112 can1-100 $\Delta far1$ $\Delta ste2$ $\Delta sst2$ | 1         |
| PPY1809       | PPY140 transformed with pKM111 and pEY15                                                                                      | 2         |
| PPY2171       | PPY140 transformed with pRLH16 and pEY15                                                                                      | 3         |
| PPY2389       | PPY140 transformed with pPM43 and pEY15                                                                                       | This work |
| PPY2392       | PPY140 transformed with pPM49 and pEY15                                                                                       | This work |
| PPY2390       | PPY140 transformed with pPM52 and pEY15                                                                                       | This work |
| PPY2394       | PPY140 transformed with pPM54 and pEY15                                                                                       | This work |
| PPY2393       | PPY140 transformed with pPM50 and pEY15                                                                                       | This work |
| PPY2391       | PPY140 transformed with pPM53 and pEY15                                                                                       | This work |

**Supplementary Table S3:** Table of Primers

| Primer Name | Sequence             |
|-------------|----------------------|
| LT62        | gtcttcaatttctcaagt   |
| LT63        | ttgaaatataaataacgttc |

**Sequences:**

**> Human Histamine Receptor 2 D98A – HR<sub>H2</sub> D98A**

ATGGCACCTAACGGTACTGCATCTAGCTTCTGCTTAGATTCTACTGCTTGTAAGAT  
TACTATTACTGTAGTATTAGCTGTATTGATTCTAATTACCGTAGCTGGCAACGTAGT  
AGTATGCTTGGCTGTAGGCTTGAACAGAAGATTGCGCAACTTGACCAACTGCTTTA  
TTGTTAGCTTAGCGATTACCGATCTACTACTAGGCCTACTGGTTCTACCGTTTAGC  
GCTATTTATCAGTTATCATGCAAATGGAGCTTTGGTAAAGTGTTCTGCAACATTTAT  
ACTTCTCTAGCTGTGATGTTGTGCACCGCTTCAATTCTGAACCTGTTTATGATTAG  
CTTAGATCGCTATTGCGCGGTAATGGACCCATTACGCTATCCAGTGTTAGTGACTC  
CTGTTAGAGTTGCGATTAGCCTGGTGCTGATTTGGGTGATTAGCATTACCCTGAG  
CTTTCTGAGCATTATCTGGGATGGAATAGCCGCAACGAAACCAGCAAAGGCAAC  
CATACCACCAGCAAATGCAAAGTGCAAGGTGAACGAAGTGTATGGCTTAGTAGATG  
GCTTAGTTACCTTCTATCTGCCATTACTAATTATGTGCATAACCTATTATAGAATCTT  
CAAAGTTGCTAGAGATCAGGCTAAGCGCATTAAACCATATTAGTAGTTGGAAGGCT  
GCTACTATTCGTGAACATAAAGCTACAGTTACCTTAGCAGCAGTAATGGGAGCATT  
TATCATTTGCTGGTTTCCGTACTTTACAGCATTTGTATATAGAGGCTTAAGAGGCG  
ATGATGCGATTAAACGAAGTATTAGAAGCGATTGTGCTGTGGTTAGGCTATGCGAA  
CTCTGCGTTGAACCCGATTCTGTATGCTGCTCTGAACCGCGACTTTAGAAGTGGC  
TATCAGCAGCTATTCTGTTGTCGTTTAGCTAACCGTAACAGTCATAAGACTAGCTT  
AAGATCTAACGCGTCACAGCTGAGCCGCACCCAGTCTCGTGAACCTAGACAGCAG  
GAAGAGAAACCATTGAAATTACAAGTGTGGTCAGGTACTGAAGTTACTGCTCCTCA  
GGGCGCTACTGATAGATAA

**>Human Histamine Receptor 2 F254A – HR<sub>H2</sub> F254A**

ATGGCACCTAACGGTACTGCATCTAGCTTCTGCTTAGATTCTACTGCTTGTAAGAT  
TACTATTACTGTAGTATTAGCTGTATTGATTCTAATTACCGTAGCTGGCAACGTAGT  
AGTATGCTTGGCTGTAGGCTTGAACAGAAGATTGCGCAACTTGACCAACTGCTTTA  
TTGTTAGCTTAGCGATTACCGATCTACTACTAGGCCTACTGGTTCTACCGTTTAGC  
GCTATTTATCAGTTATCATGCAAATGGAGCTTTGGTAAAGTGTTCTGCAACATTTAT  
ACTTCTCTAGATGTGATGTTGTGCACCGCTTCAATTCTGAACCTGTTTATGATTAGC  
TTAGATCGCTATTGCGCGGTAATGGACCCATTACGCTATCCAGTGTTAGTGACTCC  
TGTTAGAGTTGCGATTAGCCTGGTGCTGATTTGGGTGATTAGCATTACCCTGAGCT  
TTCTGAGCATTATCTGGGATGGAATAGCCGCAACGAAACCAGCAAAGGCAACCA  
TACCACCAGCAAATGCAAAGTGCAAGGTGAACGAAGTGTATGGCTTAGTAGATGGC

TTAGTTACCTTCTATCTGCCATTACTAATTATGTGCATAACCTATTATAGAATCTTCA  
AAGTTGCTAGAGATCAGGCTAAGCGCATTAACCATATTAGTAGTTGGAAGGCTGCT  
ACTATTCGTGAACATAAAGCTACAGTTACCTTAGCAGCAGTAATGGGAGCATTTAT  
CATTTGCTGGTTTCCGTACTTTACAGCAGCTGTATATAGAGGCTTAAGAGGCGATG  
ATGCGATTAACGAAGTATTAGAAGCGATTGTGCTGTGGTTAGGCTATGCGAACTCT  
GCGTTGAACCCGATTCTGTATGCTGCTCTGAACCGCGACTTTAGAAGTGGCTATC  
AGCAGCTATTCTGTTGTCGTTTAGCTAACCGTAACAGTCATAAGACTAGCTTAAGA  
TCTAACGCGTCACAGCTGAGCCGCACCCAGTCTCGTGAACCTAGACAGCAGGAA  
GAGAAACCATTGAAATTACAAGTGTGGTCAGGTACTGAAGTTACTGCTCCTCAGG  
GCGCTACTGATAGATAA

**>Human Histamine Receptor 2 D186A – HR<sub>H2</sub> D186A**

ATGGCACCTAACGGTACTGCATCTAGCTTCTGCTTAGATTCTACTGCTTGTAAGAT  
TACTATTACTGTAGTATTAGCTGTATTGATTCTAATTACCGTAGCTGGCAACGTAGT  
AGTATGCTTGGCTGTAGGCTTGAACAGAAGATTGCGCAACTTGACCAACTGCTTTA  
TTGTTAGCTTAGCGATTACCGATCTACTACTAGGCCTACTGGTTCTACCGTTTAGC  
GCTATTTATCAGTTATCATGCAAATGGAGCTTTGGTAAAGTGTTCTGCAACATTTAT  
ACTTCTCTAGATGTGATGTTGTGCACCGCTTCAATTCTGAACCTGTTTATGATTAGC  
TTAGATCGCTATTGCGCGGTAATGGACCCATTACGCTATCCAGTGTTAGTGACTCC  
TGTTAGAGTTGCGATTAGCCTGGTGCTGATTTGGGTGATTAGCATTACCCTGAGCT  
TTCTGAGCATTTCATCTGGGATGGAATAGCCGCAACGAAACCAGCAAAGGCAACCA  
TACCACCAGCAAATGCAAAGTGCAGGTGAACGAAGTGTATGGCTTAGTAGCTGGC  
TTAGTTACCTTCTATCTGCCATTACTAATTATGTGCATAACCTATTATAGAATCTTCA  
AAGTTGCTAGAGATCAGGCTAAGCGCATTAACCATATTAGTAGTTGGAAGGCTGCT  
ACTATTCGTGAACATAAAGCTACAGTTACCTTAGCAGCAGTAATGGGAGCATTTAT  
CATTTGCTGGTTTCCGTACTTTACAGCATTTGTATATAGAGGCTTAAGAGGCGATG  
ATGCGATTAACGAAGTATTAGAAGCGATTGTGCTGTGGTTAGGCTATGCGAACTCT  
GCGTTGAACCCGATTCTGTATGCTGCTCTGAACCGCGACTTTAGAAGTGGCTATC  
AGCAGCTATTCTGTTGTCGTTTAGCTAACCGTAACAGTCATAAGACTAGCTTAAGA  
TCTAACGCGTCACAGCTGAGCCGCACCCAGTCTCGTGAACCTAGACAGCAGGAA  
GAGAAACCATTGAAATTACAAGTGTGGTCAGGTACTGAAGTTACTGCTCCTCAGG  
GCGCTACTGATAGATAA

**>Human Histamine Receptor 2 Y250A – HR<sub>H2</sub> Y250A**

ATGGCACCTAACGGTACTGCATCTAGCTTCTGCTTAGATTCTACTGCTTGTAAGAT  
TACTATTACTGTAGTATTAGCTGTATTGATTCTAATTACCGTAGCTGGCAACGTAGT  
AGTATGCTTGGCTGTAGGCTTGAACAGAAGATTGCGCAACTTGACCAACTGCTTTA  
TTGTTAGCTTAGCGATTACCGATCTACTACTAGGCCTACTGGTTCTACCGTTTAGC  
GCTATTTATCAGTTATCATGCAAATGGAGCTTTGGTAAAGTGTTCTGCAACATTTAT  
ACTTCTCTAGATGTGATGTTGTGCACCGCTTCAATTCTGAACCTGTTTATGATTAGC  
TTAGATCGCTATTGCGCGGTAATGGACCCATTACGCTATCCAGTGTTAGTGACTCC  
TGTTAGAGTTGCGATTAGCCTGGTGCTGATTTGGGTGATTAGCATTACCCTGAGCT  
TTCTGAGCATTTCATCTGGGATGGAATAGCCGCAACGAAACCAGCAAAGGCAACCA  
TACCACCAGCAAATGCAAAGTGCAGGTGAACGAAGTGTATGGCTTAGTAGATGGC  
TTAGTTACCTTCTATCTGCCATTACTAATTATGTGCATAACCTATTATAGAATCTTCA

AAGTTGCTAGAGATCAGGCTAAGCGCATTAACCATATTAGTAGTTGGAAGGCTGCT  
ACTATTCGTGAACATAAAGCTACAGTTACCTTAGCAGCAGTAATGGGAGCATTTAT  
CATTTGCTGGTTTCCGGCTTTTACAGCATTTGTATATAGAGGCTTAAGAGGCGATG  
ATGCGATTAACGAAGTATTAGAAGCGATTGTGCTGTGGTTAGGCTATGCGAACTCT  
GCGTTGAACCCGATTCTGTATGCTGCTCTGAACCGCGACTTTAGAAGTGGCTATC  
AGCAGCTATTCTGTTGTCGTTTAGCTAACCGTAACAGTCATAAGACTAGCTTAAGA  
TCTAACGCGTCACAGCTGAGCCGCACCCAGTCTCGTGAACCTAGACAGCAGGAA  
GAGAAACCATTGAAATTACAAGTGTGGTCAGGTACTGAAGTTACTGCTCCTCAGG  
GCGCTACTGATAGATAA

**>Human Histamine Receptor 2 Y182A – HR<sub>H2</sub> Y182A**

ATGGCACCTAACGGTACTGCATCTAGCTTCTGCTTAGATTCTACTGCTTGTAAGAT  
TACTATTACTGTAGTATTAGCTGTATTGATTCTAATTACCGTAGCTGGCAACGTAGT  
AGTATGCTTGGCTGTAGGCTTGAACAGAAGATTGCGCAACTTGACCAACTGCTTTA  
TTGTTAGCTTAGCGATTACCGATCTACTACTAGGCCTACTGGTTCTACCGTTTAGC  
GCTATTTATCAGTTATCATGCAAATGGAGCTTTGGTAAAGTGTCTGCAACATTTAT  
ACTTCTCTAGATGTGATGTTGTGCACCGCTTCAATTCTGAACCTGTTTATGATTAGC  
TTAGATCGCTATTGCGCGGTAATGGACCCATTACGCTATCCAGTGTTAGTGAAGTCC  
TGTTAGAGTTGCGATTAGCCTGGTGCTGATTTGGGTGATTAGCATTACCCTGAGCT  
TTCTGAGCATTCTGTTGATGGAATAGCCGCAACGAAACCAGCAAAGGCAACCA  
TACCACCAGCAAATGCAAAGTGCAGGTGAACGAAGTGGCTGGCTTAGTAGATGGC  
TTAGTTACCTTCTATCTGCCATTACTAATTATGTGCATAACCTATTATAGAATCTTCA  
AAGTTGCTAGAGATCAGGCTAAGCGCATTAACCATATTAGTAGTTGGAAGGCTGCT  
ACTATTCGTGAACATAAAGCTACAGTTACCTTAGCAGCAGTAATGGGAGCATTTAT  
CATTTGCTGGTTTCCGTACTTTACAGCATTTGTATATAGAGGCTTAAGAGGCGATG  
ATGCGATTAACGAAGTATTAGAAGCGATTGTGCTGTGGTTAGGCTATGCGAACTCT  
GCGTTGAACCCGATTCTGTATGCTGCTCTGAACCGCGACTTTAGAAGTGGCTATC  
AGCAGCTATTCTGTTGTCGTTTAGCTAACCGTAACAGTCATAAGACTAGCTTAAGA  
TCTAACGCGTCACAGCTGAGCCGCACCCAGTCTCGTGAACCTAGACAGCAGGAA  
GAGAAACCATTGAAATTACAAGTGTGGTCAGGTACTGAAGTTACTGCTCCTCAGG  
GCGCTACTGATAGATAA

**>Human Histamine Receptor 2 T190A – HR<sub>H2</sub> T190A**

ATGGCACCTAACGGTACTGCATCTAGCTTCTGCTTAGATTCTACTGCTTGTAAGAT  
TACTATTACTGTAGTATTAGCTGTATTGATTCTAATTACCGTAGCTGGCAACGTAGT  
AGTATGCTTGGCTGTAGGCTTGAACAGAAGATTGCGCAACTTGACCAACTGCTTTA  
TTGTTAGCTTAGCGATTACCGATCTACTACTAGGCCTACTGGTTCTACCGTTTAGC  
GCTATTTATCAGTTATCATGCAAATGGAGCTTTGGTAAAGTGTCTGCAACATTTAT  
ACTTCTCTAGATGTGATGTTGTGCACCGCTTCAATTCTGAACCTGTTTATGATTAGC  
TTAGATCGCTATTGCGCGGTAATGGACCCATTACGCTATCCAGTGTTAGTGAAGTCC  
TGTTAGAGTTGCGATTAGCCTGGTGCTGATTTGGGTGATTAGCATTACCCTGAGCT  
TTCTGAGCATTCTGTTGATGGAATAGCCGCAACGAAACCAGCAAAGGCAACCA  
TACCACCAGCAAATGCAAAGTGCAGGTGAACGAAGTGTATGGCTTAGTAGATGGC  
TTAGTTGCTTTCTATCTGCCATTACTAATTATGTGCATAACCTATTATAGAATCTTCA

AAGTTGCTAGAGATCAGGCTAAGCGCATTAACCATATTAGTAGTTGGAAGGCTGCT  
ACTATTCGTGAACATAAAGCTACAGTTACCTTAGCAGCAGTAATGGGAGCATTTAT  
CATTTGCTGGTTTCCGTACTTTACAGCATTTGTATATAGAGGCTTAAGAGGCGATG  
ATGCGATTAACGAAGTATTAGAAGCGATTGTGCTGTGGTTAGGCTATGCGAACTCT  
GCGTTGAACCCGATTCTGTATGCTGCTCTGAACCGCGACTTTAGAACTGGCTATC  
AGCAGCTATTCTGTTGTCGTTTAGCTAACCGTAACAGTCATAAGACTAGCTTAAGA  
TCTAACGCGTCACAGCTGAGCCGCACCCAGTCTCGTGAACCTAGACAGCAGGAA  
GAGAAACCATTGAAATTACAAGTGTGGTCAGGTAAGTTACTGCTCCTCAGG  
GCGCTACTGATAGATAA

## References

1. Mukherjee, K.; Bhattacharyya, S.; Peralta-Yahya, P., GPCR-Based Chemical Biosensors for Medium-Chain Fatty Acids. *ACS Synth Biol* **2015**, 4, 1261-1269.
2. Yasi, E. A.; Allen, A. A.; Sugianto, W.; Peralta-Yahya, P., Identification of Three Antimicrobials Activating Serotonin Receptor 4 in Colon Cells. *ACS Synth Biol* **2019**, 8, 2710-2717.
3. Marquez-Gomez, P. L.; Kruyer, N. S.; Eisen, S. L.; Torp, L. R.; Howie, R. L.; Jones, E. V.; France, S.; Peralta-Yahya, P., Discovery of 8-Hydroxyquinoline as a Histamine Receptor 2 Blocker Scaffold. *ACS Synth Biol* **2022**, 11, 2820-2828.
